# Supplementary material for: Fluorescently-tagged magnetic protein nanoparticles for high-resolution optical and ultra-high field magnetic resonance dual-modal cerebral angiography
Source: Royal Society of Chemistry journal article supplement (doi:10.1039/d2nr04878g), 2022-01-01
Supplement: d2nr04878g1.pdf [file d2nr04878g1.pdf]

**Fluorescently-Tagged Magnetic Protein Nanoparticles for High-Resolution Optical and Ultra-High  
Field Magnetic Resonance Dual-Modal Cerebral Angiography**

Sandeep K. Mishra<sup>\*</sup>,<sup>1,2</sup>, Peter Herman<sup>1,2</sup>, Michael Crair<sup>4</sup>, R. Todd Constable<sup>1,5</sup>, John J. Walsh<sup>3</sup>,

Adil Akif<sup>3</sup>, Justus V. Verhagen<sup>4,6</sup>, Fahmeed Hyder<sup>\*1,2,3</sup>

<sup>1</sup>Department of Radiology and Biomedical Imaging, <sup>2</sup>Magnetic Resonance Research Center,

<sup>3</sup>Department of Biomedical Engineering, <sup>4</sup>Department of Neuroscience, <sup>5</sup>Department of  
Neurosurgery, Yale University, New Haven, CT, United States, <sup>6</sup>The John B. Pierce Laboratory,  
New Haven, CT, United States.

**Correspondence:**

\*Sandeep Kumar Mishra/Fahmeed Hyder

The Anlyan Center (TAC), MRRC, 300 Cedar Street,

Yale University, New Haven, CT 06520, USA

**Email:** sandeepkmishra11@gmail.com/sandeep.kumar@yale.edu/fahmeed.hyder@yale.edu

**Keywords:** Extremely small iron oxide nanoparticles; T1/positive MRI; optical angiography;  
magnetic resonance angiography; cerebral angiography; magnetic protein nanoparticles.

## **Contents of Supplementary Materials.**

### **Supplementary Table.**

**Table ST1.** Magnetic Properties of NPs measured by SQUID at 1.5T applied magnetic field.

### **Supplementary Figures.**

**Fig. S1.** EDX spectra of NPs showing elemental distributions.

**Fig. S2.** FTIR spectra of NPs as well as some intermediates.

**Fig. S3.** Colloidal stability of f-MPNPs.

**Fig. S4.** CIE fluorescent plot of fluorescent dye with and without conjugation.

**Fig. S5.** Photostability of f-MPNPs.

**Fig. S6.** XPS survey spectra c-FeMNP and MPNP.

**Fig. S7.** Evaluation of MRI properties of GdDOTA.

**Fig. S8.** Blood half-life of NPs based on fluorescent intensity and iron content in plasma.

**Fig. S9.** Cerebral angiography by real-time in vivo MRA of rats.

**Fig. S10.** Cerebral angiography by real-time in vivo fluorescence imaging of rats.

**Fig. S11.** Biodistribution pattern for 3h and 24 h after i.v. injection of the f-MPNPs in rats.

### **Supplementary Movies.**

**Movie SM1.** In vitro evaluation of concentration required for T1 MRI and optical imaging of large and small vessels phantom with different concentrations of f-MPNPs.

**Movie SM2.** In vivo 3D TOF MRA of mice brain pre- and post-injection of f-MPNPs.

**Movie SM3.** In vivo 3D FLASH MRA of mice brain at 0 min (pre-injection), and 5 min and 50 min post-injection of f-MPNPs.

**Table ST1.** Magnetic Properties of NPs measured by SQUID at 1.5T applied magnetic field.

|                 | <b>Magnetic moment<br/>(emu/g)</b> | <b>Coercivity<br/>(Oe)</b> | <b>Retentivity<br/>(emu/g)</b> |
|-----------------|------------------------------------|----------------------------|--------------------------------|
| <b>c-FeMNPs</b> | 0.135                              | 34.62                      | $9.4 \times 10^{-4}$           |
| <b>f-MPNPs</b>  | 0.085                              | 26.51                      | $11.2 \times 10^{-4}$          |

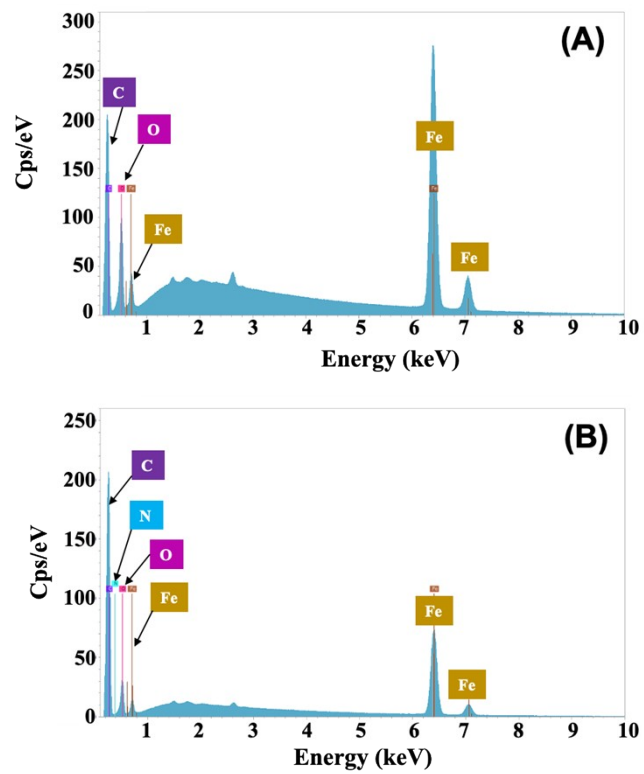

**Figure S1.** EDX survey spectra of magnetic NPs showing elemental distributions. (A) c-FeMNPs and (B) f-MPNPs.

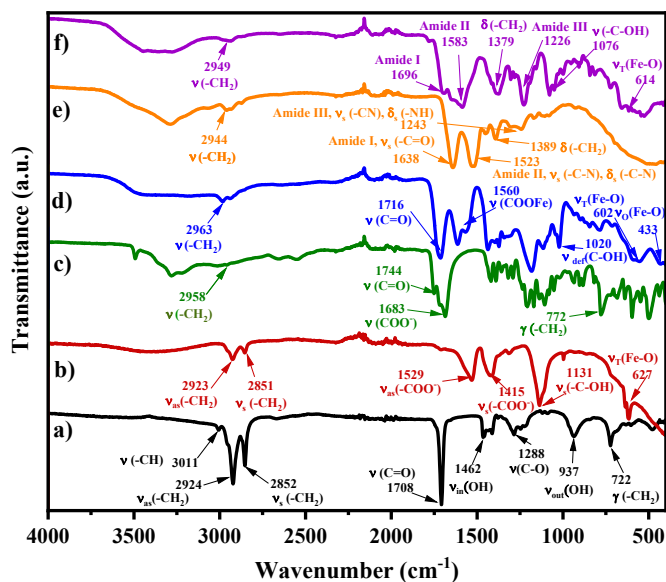

**Figure S2.** FTIR spectra of MNPs as well as some intermediates (with glossary of terms:  $\nu$  = Stretching vibration;  $\delta$  = Bending vibration;  $\gamma$  = Wagging, twisting, rocking; **def** = Deformation; **as** = Asymmetric; **s** = Symmetric).

**a)** Pristine oleic acid;  $-\text{CH}_2$  asymmetric stretching vibration at  $2924\text{ cm}^{-1}$  and symmetric vibration at  $2852\text{ cm}^{-1}$ , and stretching vibration of  $\text{C}=\text{O}$  (of prominent  $-\text{COOH}$  group), and in-plane stretching vibration of  $-\text{OH}$  at  $1462\text{ cm}^{-1}$  and out-plane stretching vibration of  $-\text{OH}$  at  $1462\text{ cm}^{-1}$  are characteristic peaks of oleic acid. **b)** o-FeMNPs; after several washes and centrifugation to ensure excess oleic acid and oleyl alcohol are removed, the FTIR spectrum of oleic acid coated FeMNPs (o-FeMNPs) reveals additional peaks of  $-\text{COO}^-$  asymmetric stretching vibration at  $2924\text{ cm}^{-1}$  and symmetric vibration at  $2852\text{ cm}^{-1}$ , and high intensity symmetric vibration of  $-\text{C-OH}$ , and symmetric vibration for tetragonal  $\text{Fe-O}$  confirming oleic acid coating on the surface of FeMNPs. **c)** Pristine sodium citrate; stretching vibration ( $-\text{C}=\text{O}$ ) at  $1744\text{ cm}^{-1}$ , and stretching vibration ( $-\text{COO}^-$ ) at  $1683\text{ cm}^{-1}$ , and rocking vibration ( $-\text{CH}_2$ ) are characteristic peaks of sodium citrate. **d)** c-FeMNPs; citric acid coated FeMNPs reveals shift in stretching vibration ( $-\text{C}=\text{O}$ ) to  $1716\text{ cm}^{-1}$ , and shift in stretching vibration of ( $-\text{COO}^-$ ) to  $1560\text{ cm}^{-1}$  after interaction with  $\text{Fe(III)}$  ions on the nanoparticle surface. Appearance of additional peaks deformation vibration of ( $-\text{C-OH}$ ), stretching vibration of tetrahedral  $\text{Fe-O}$  at  $602\text{ cm}^{-1}$  and octahedral  $\text{Fe-O}$  at  $433\text{ cm}^{-1}$  confirms citric acid surface modification on FeMNPs devoid of free citrate. **e)** Pristine bovine serum albumin (the model protein); characteristic peaks of the protein are Amide I at  $1638\text{ cm}^{-1}$ , Amide II at  $1523\text{ cm}^{-1}$  and Amide III at  $1243\text{ cm}^{-1}$ . **f)** MNPs; protein conjugation with c-FeMNPs shows shift in Amide I to  $1696\text{ cm}^{-1}$ , Amide II to  $1583\text{ cm}^{-1}$  and Amide III to  $1226\text{ cm}^{-1}$ , and additional peaks of stretching vibration ( $\text{C-OH}$ ) at  $1076\text{ cm}^{-1}$  and of stretching vibration of tetrahedral  $\text{Fe-O}$  peak at  $614\text{ cm}^{-1}$  confirm the covalent conjugation of c-FeMNPs and protein molecules.

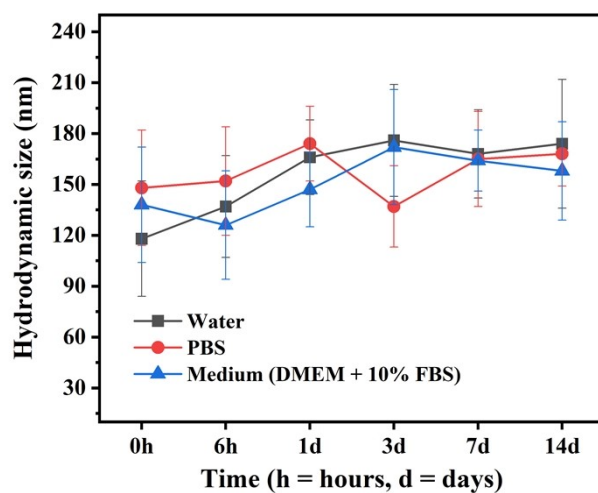

**Figure S3. Colloidal stability of f-MPNPs.** Colloidal stability was analyzed in water, PBS, and cell culture media (DMEM + 10% FBS). A known concentration of NPs was prepared in water, PBS, and DMEM media and stored at 25 °C. (n = 5 for each media) The hydrodynamic size was measured at predetermined time intervals for a 14-day study period.

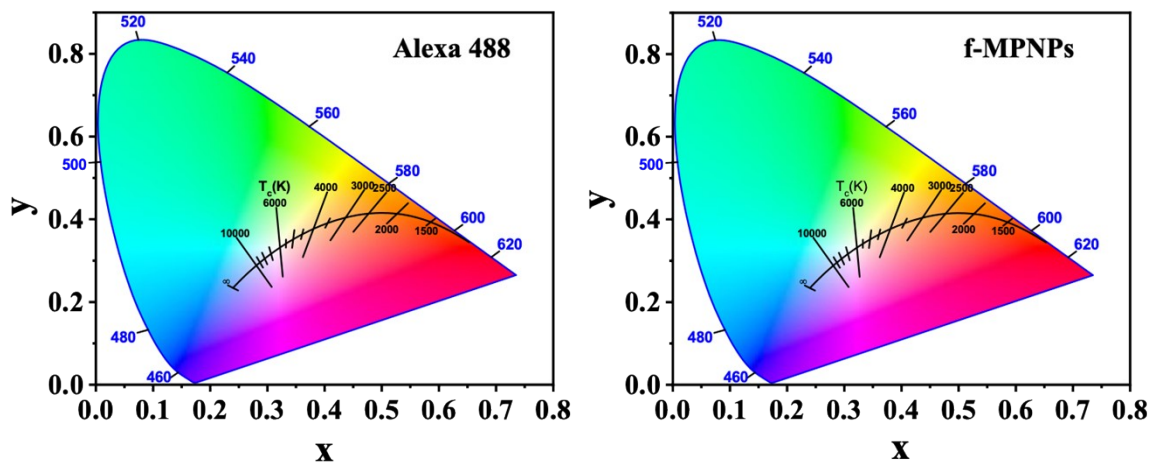

**Figure S4.** CIE fluorescent plot of fluorescent dye with and without conjugation; **(A)** Alexa Fluor 488 dye and **(B)** Alexa Fluor 488 conjugated MPNPs (f-MPNPs).

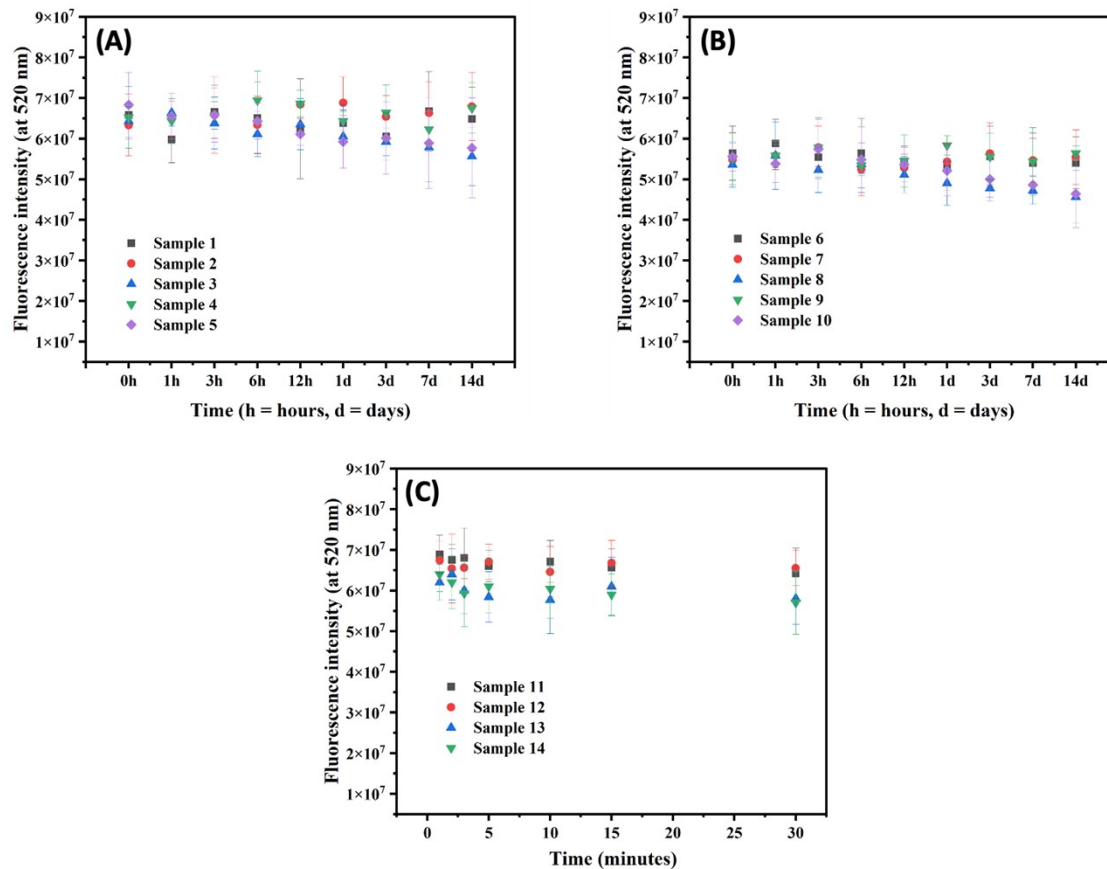

**Figure S5. Photostability of f-MPNPs.** The photostability of f-MPNPs was evaluated at different conditions. The samples were preconditioned at various conditions (**Solvent/Temperature/Light**) and then photostability tests were performed by recording the fluorescence emission at 520 nm by excitation at 488 nm wavelength. Two solvents were selected: PBS and rat blood plasma (Plasma). Three light conditions were applied: dark, bright light (daylight lamp) and illumination under LED light source of wavelength 488 nm. We selected three temperature conditions: 4°C (storage temperature), 25°C (room temperature) and 37°C (body temperature). **(A)** f-MPNPs were dissolved in PBS and different conditions were applied; **Sample 1** - PBS/4°C/Dark; **Sample 2** - PBS/25°C/Dark, **Sample 3** - PBS/37°C/Dark, **Sample 4** - PBS/25°C/Bright, and **Sample 5** - PBS/37°C/Bright. **(B)** f-MPNPs were dissolved in plasma and different conditions were applied; **Sample 6** - Plasma/4°C/Dark, **Sample 7** - Plasma/25°C/Dark, **Sample 8** - Plasma/37°C/Dark, **Sample 9** - Plasma/25°C/Bright, and **Sample 10** - Plasma/37°C/Bright. **(C)** f-MPNPs solutions were irradiated with 488 nm LED light for definite time: **Sample 11** - PBS/25°C/LED, **Sample 12** - PBS/37°C/LED, **Sample 13** - Plasma/25°C/LED, and **Sample 14** - Plasma/37°C/LED. (n = 5 for each sample)



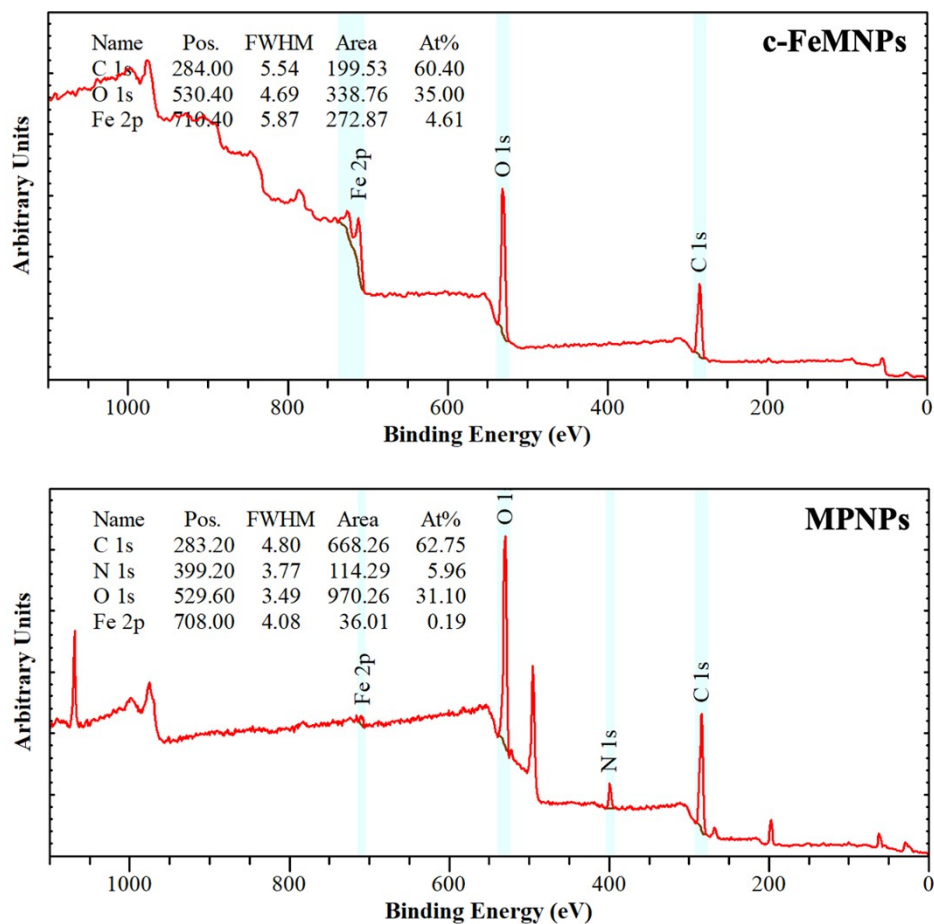

**Figure S6.** XPS survey spectra of c-FeMNPs and MPNPs; (A) c-FeMNPs, reveals elemental composition as C 1s, O 1s and Fe 2p, and (B) MPNPs, reveals elemental composition as C 1s, O 1s, Fe 2p and N 1s peaks (some additional peaks denote Na and Cl elements from HCl, NaOH and saline solution).

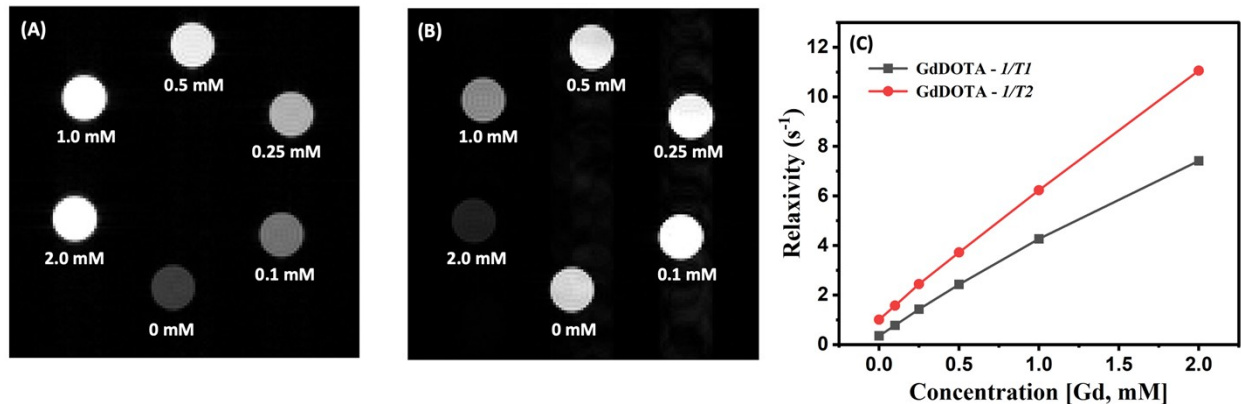

**Figure S7.** Evaluation of MRI properties of GdDOTA. (A) T1 weighted ( $T1w$ ) (B) T2 weighted ( $T2w$ ) images of GdDOTA for different Gd concentrations. (C) Relaxivity evaluation of Gd concentration; plots of GdDOTA;  $1/T1$  (black ■),  $1/T2$  (red ●). The slope indicates the specific relaxivity ( $r$ ). The series of concentrations of GdDOTA reveals longitudinal relaxivity ( $r_1$ ) = 4.26, transverse relaxivity ( $r_2$ ) = 6.23, and the  $r_2/r_1 = 1.46$ , at 11.7T.

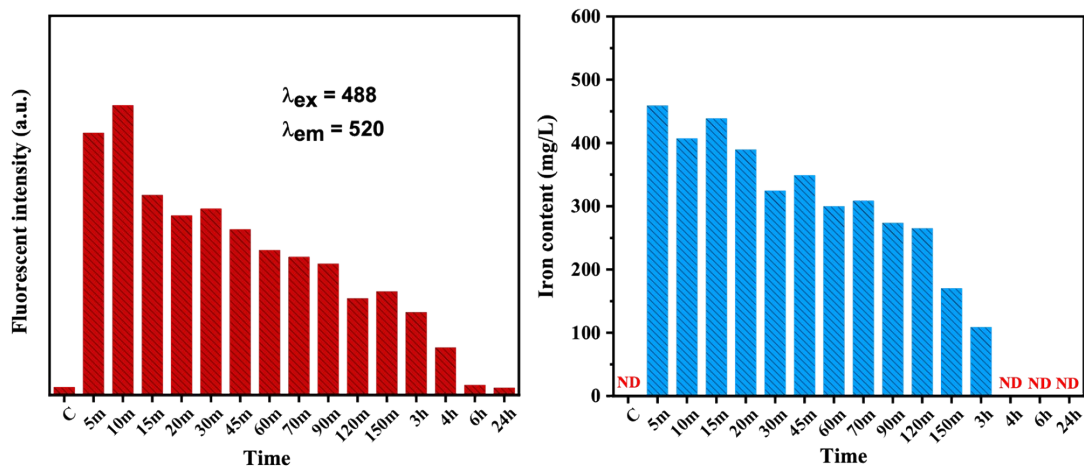

**Figure S8.** Blood half-life and iron content of MNPs. **(A)** Blood half-life of f-MPNPs estimated by measuring fluorescence intensity ( $\lambda_{ex} = 488$ ,  $\lambda_{em} = 520$ ) by plate reader and **(B)** iron content in blood plasma by ICP-MS. Both methods reveal a circulation half-life of 90-100 minutes from rat blood samples.

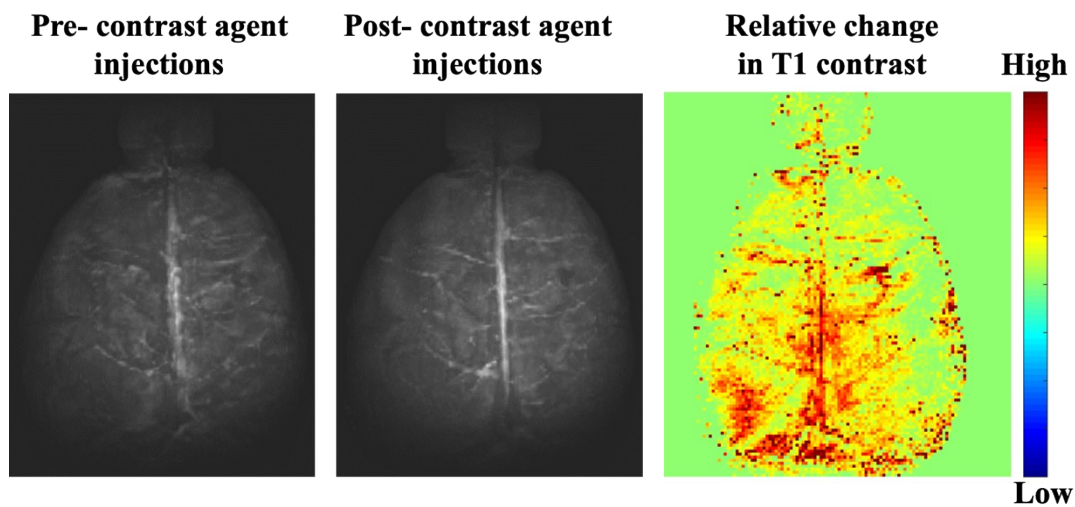

**Figure S9.** Cerebral angiography by real-time in vivo MRA of rats. Data from rat brain treated with f-MPNPs demonstrates enhanced 30-40% T1 contrast enhancement using 3D-FLASH sequence. (Scale = low to high represents 0 to 100 % arbitrary unit)

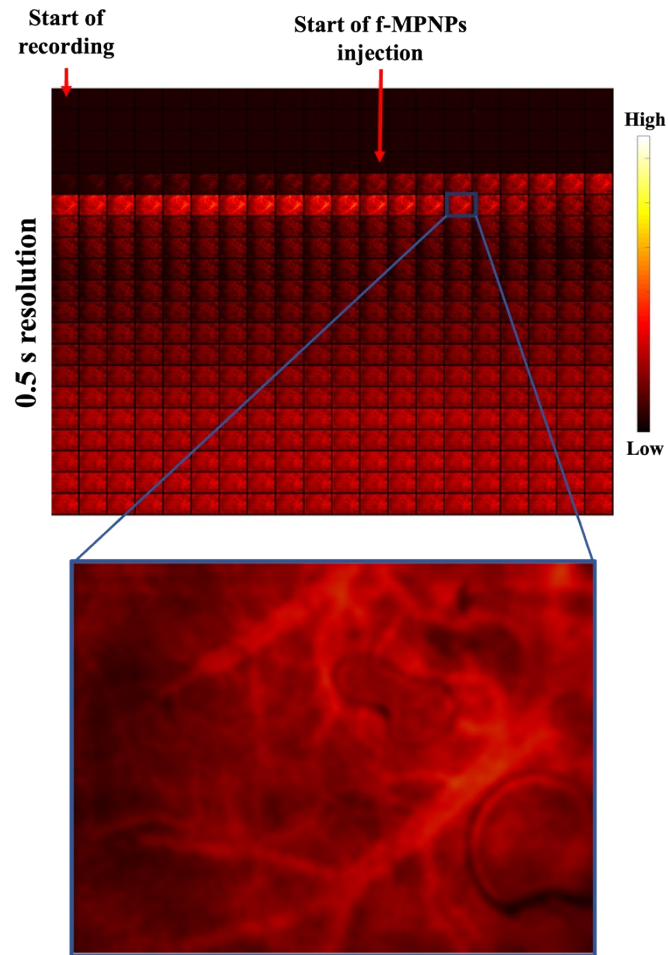

**Figure S10.** Cerebral angiography by real-time in vivo fluorescence imaging of rat brain after intravenously injection with f-MPNPs (image resolution = 0.5s). Scale = 1mm. (Scale = low to high represents 0 to 100 % arbitrary unit)

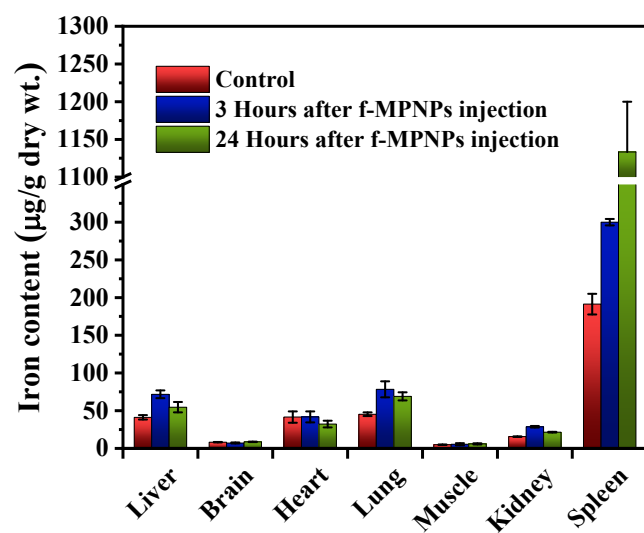

**Figure S11.** Biodistribution pattern for 3h and 24 h after intravenous injection of the f-MPNPs in rats.
